# Supplementary material for: Driving Neurogenesis in Neural Stem Cells with High Sensitivity Optogenetics
Source: Springer Nature journal article supplement (doi:10.1007/s12017-019-08573-3), 2019-10-08
Supplement: MOESM1 [file 17250814]

**Driving Neurogenesis in Neural Stem Cells**

**with High Sensitivity Optogenetics**

**Supplementary Materials**

*Daniel Boon Loong Teh1, 2†, Ankshita Prasad3, Wenxuan Jiang4, Nianchen Zhang5, Yang Wu5, Hyunsoo Yang5, Sanyang Han6, Zhigao Yi7, Yanzhuang Yeo7, Toru Ishizuka8, Limsoon Wong9, Nitish Thakor2, 10, Hiromu Yawo8†, Xiaogang Liu7, Angelo ALL2, 10, 11**

*1Department of Biochemistry &, 2Singapore Institute of Neurotechnology (SINAPSE), National University of Singapore, 28 Medical Drive, 5-COR, 117456, Singapore. Tel: +65 6601 3406*

*3Biomedical Institute for Global Health Research and Technology (BIGHEART), National University of Singapore (NUS) MD6, 14 Medical Drive, #14-01 Singapore 1175994*

*4Department of Biomedical Engineering, University of Southern California, Los Angeles, CA 90080.*

*5Department of Electrical and Computer Engineering, National University of Singapore, 4 Engineering Drive 3, 117576, Singapore.*

*6Optoelectronics Group, University of Cambridge, Cavendish Laboratory, J J Thomson Avenue, Cambridge, CB2 0HE.*

*7Department of Chemistry, National University of Singapore, 3 Science Drive 3, Singapore 117543, Singapore.*

*8Department of Integrative Life Sciences, Tohoku University Graduate School of Life Sciences, 2-1-1 Katahira, Aoba-ku, Sendai 980-8577, Japan. Tel: +81-22-217-6209*

*9Department of Computer Science, National University of Singapore, 13 Computing Drive, Singapore 117417.*

*10Department of Biomedical Engineering &, 11Neurology, Johns Hopkins School of Medicine, 701C Traylor Building, 720 Rutland Avenue, Baltimore, MD 21205, USA. Tel: +410-502-5393*

Correspondence and requests for materials should be addressed to *†*co-corresponding authors: D.T. (danielteh@nus.edu.sg) and H.Y. (hiromu.yawo.c7@tohoku.ac.jp) and or *corresponding author A.L. (hmn@jhu.edu)

**Supplementary Methods**

**Neural stem cell culture**

A clonal line of neural stem/progenitor cells (PZ5) derived from adult rat hippocampus (Palmer et al., 1997) was used as model neural stem cells (NSCs). NSCs were maintained as previously described in a proliferative state with medium consisting of: DMEM:F12 (1:1 11320-033, Gibco®, Thermo Fisher Scientific Co., Waltham, MA, USA), N2 supplement 1X (17502001, Invitrogen®, Thermo Fisher), 10 ng/mL of basic recombinant human fibroblast growth factor (FGF) (233-FB-010, R&D system, Minneapolis, MN, USA), 20 ng/mL of human epidermal growth factor (EGF) (E9644, Sigma-Aldrich, St Louis, MO, USA), and 1% penicillin-streptomycin (:09367-34, Nacalai Tesque, Shiga, Japan) (Teh et al. 2014). Cells were passaged at 75% confluency with STEMPRO Accutase (A1110501, Gibco) (Palmer et al. 1997). To induce differentiation, cells were plated onto polyornithin/laminin flasks in proliferation medium. After 24 hours, cells were washed with DPBS twice and replaced with differentiation medium, DMEM: F12 (without phenol red), B27 (Gibco) supplemented with 20 ng/mL of brain-derived neurotropic factor (BDNF, R&D systems), 0.3% fetal bovine serum (FBS) and 1.0 µM all trans-retinoic acid (2625, Sigma-Aldrich) for 12 days.

**Generation of stable SFO-NSCs**

*SFO Expression cassette.* The cDNA fragment encoding mammalian codon-optimized ChRFR(C167A) tagged with a yellow fluorescent protein Venus was amplified by PCR from pmChRFR(C167A)-Venus and inserted into EcoRI sites of pCAGGS (Niwa et al. 1991) with In-Fusion cloning technology (121416, Takara bio, Shiga, Japan) to complete the construction of the plasmid pCAG-mChRFR(C167A)-Venus. An SFO expression cassette containing CAG promoter, mChRFR-Venus, and β-globin polyA was prepared by SalI/HindIII digestion of pCAG-mChRFR(C167A)-Venus.

*Non-viral gene delivery.* For the *piggyBac* transposase expression construct (pCAG-PBase), the *piggyBac* ORF was excised from pBSII-IE1-orf (a kind gift from Dr. Malcolm Fraser, University of Notre Dame, USA) by EcoRI and XbaI digestion. The ORF fragment was inserted into EcoRI/NheI sites of the digested pCAT-MCS (a kind gift from Dr. Yuchio Yanagawa, Gunma University, Japan) so that the expression of the transposase was regulated by CAG promoter. The donor plasmid (pCAG-mChRFR(C167A)-BacII) was constructed by inserting the SFO expression cassette into the SalI/HindIII sites of pXL-BacII (Li et al. 2001). The ChRFR(C167A)-*bac* plasmid was then transfected into PZ5 neural stem cells via Effectene® transfection reagent (301425, Qiagen, Venlo, Netherlands‎). Positive cells were sorted out with FACSAria Cell Sorter (BD Bioscience, San Jose, CA). Homogenous and stable expression of SFO-NSCs were maintained and expanded to be used for subsequent experiments.

**Electrophysiology**

The bathing solution contained (in mM) 138 NaCl, 3 KCl, 10 HEPES, 4 NaOH, with pH 7.4 adjusted with 1 N HCl. The patch solutions used contained (in mM) 120 CsOH, 120 gluconic acid, 10 CsCl, 10 EGTA, 10 HEPES, 1 MgCl2, 3 MgATP, 0.1 Leupeptin, pH 7.4 adjusted by 1N CsOH. Whole-cell patch-clamp recordings were performed on SFO-NSCs differentiated for 3 days. The visualization of ChRFR(C167A)-expressing cells was aided with the expression of Venus fluorescence under conventional epifluorescent microscopy (BX51WI, Olympus, Tokyo, Japan) with 60X water immersion objective lens. With the successful formation of a tight seal, the optical filter set was switched to the bicolor illuminator equipped with a blue (470 ± 25 nm, LXHL-NB98, Lumileds, San Jose, CA) and an amber LED (590 ± 14 nm, LXHL-NL98, Lumileds). Photocurrents were recorded at a holding potential of -60 mV using Axopatch 200A (Molecular Devices, Sunnyvale, CA) and digitized at 10 Hz using Digidata 1200 (Molecular Devices) for the analysis using Clampfit 10.1 (Molecular Devices). Each ON/OFF photocurrent was fitted by a single-exponential function of the time during the transition phase between 10 and 90% of the peak response as described previously (Hososhima et al. 2015) without any obvious deviation from the raw data. All experiments were carried out at room temperature (22-25ºC).

**Bi-color illumination device**

The schematic diagram of the illumination setup for optical stimulation (OS) is shown in Fig. 3a. Two collimated high power LED light sources were utilized in this study. The output power is up to 650 mW for the blue light (wavelength centered at 470 nm) and up to 445 mW for the amber light (wavelength centered at 595 nm). Each light beam was aligned through a dichroic mirror (505 nm) and propagated along the same optical path to the samples. The illumination device was set 14 cm above the SFO-NSC culture in the incubator (Fig. 3b). The irradiance was almost uniform at the center target region with a light power density of 0.27 mW/mm2 (blue) and 0.41 mW/mm (amber), respectively (supplementary data 2). The on-off of each LED was driven by a programmable dual channel signal generator with an optical stimulation (OS) protocol of blue (1 s) -amber (3 s) -dark (1 s) pulse at 0.2 Hz for 30 minutes/day (that is, 360 pulses/day) throughout the differentiation from day 1 (D1) till day 12 (D12).

**Immunohistochemistry**

For imaging, cells were plated onto polyornithine/laminin coated 80426 µ-Slide 4 Wells, ibiTreat: #1.5 (ibidi, Martinsried, Germany). Plated cells were rinsed with DPBS for three times, fixed with 4% paraformaldehye (PFA) diluted in 1X PBS, for 10 minutes, and washed with DPBS three times. Cells were then blocked with PBS including 5% normal donkey serum and 0.3% Triton X-100 at 4ºC for 30 minutes and reacted with primary antibodies in 4ºC for 24 hours: rabbit anti-GFP (1:500, AB290, Abcam, Cambridge, UK) for Venus; mouse anti-nestin (1:1000, MAB353, Merck, Darmstadt, Germany) for the stem cell marker; chicken anti-neurofilament 200 (anti-NF200, 1:1000, AB4680, Abcam) for neurons; guinea pig anti-tau antibody (anti-tau, 1:400, 314004, Synaptic system, Goettingen Germany) for axons. After washed three times with washing buffer (DPBS containing 0.1% Triton X-100), the samples were incubated with secondary antibodies (all from Thermo Fisher) at room temperature for 3 hours: Alexa Fluor 488-conjugated anti-rabbit Ab (goat, 1:200, ab150077), Alexa Fluor 546-conjugated anti-mouse IgG (goat, 1:200, A-11030) and Alexa Flour 546-conjugated anti-chicken IgG (goat, 1:200, A-11040) and Alexa Fluor 546-conjugated anti-guinea pig IgG (goat, 1:200, A-11074), respectively. Three final washes of 10 minutes each, were carried out at the end of the incubation and 0.5 μg/mL of 4',6-diamidino-2-phenylindole (DAPI) were added in the final second washing to stain the nucleus of the cells. Images were visualized under conventional epi-fluorescent microscopy (Axio Observer 7, Carl Zeiss, Oberkochen, Germany) equipped with a CCD camera (Axiocam 506, Carl Zeiss). Each fluorescent probe was detected using the optimal combination of excitation/detection wavelengths; 493/517 nm for Alexa 488, 557/572 nm for Alexa 546 and 353/465 nm for DAPI. All images were corrected for standardized brightness and contrast, throughout all samples, to remove non-specific staining as much as possible using ZEN Blue software (Carl Zeiss). For counting the cell numbers, 6 random fields were imaged from 20X objective lens for quantification for each immunohistochemistry experiment. Images were analysed either directly or by Fiji-ImageJ software. The total length of every tau+ process (axon) was measured using Zen Blue Software from its cell body to axon terminal. At least 31 neurons per condition were analyzed from at 3 independent experimental repeats.

**Reverse transcriptase polymerase chain reaction (RT-PCR)**

The SFO-NSCs were plated on a coated 25 cm2 culture flask and the medium was switched to differentiation medium after 24 hours. The cells were allowed to differentiate for 12 days with/without the daily OS. After 12 days of differentitation (D12), RNAs were collected from SFO-NSCs with RNeasy Mini Kit (74106, Qiagen) while removing genomic DNA with RNase-Free DNase set (74106, Qiagen). All samples had a RIN value of more than 9 and absorbance ratio of 260 nm and 280 nm (A260/A280) of more than 2.0. The primers used for *c-fos* mRNA were 5'-ACG ACC ATG ATG TTC TCG GG-3', 5'-TGG CAC TAG AGA CGG ACA GA-3'.

**Transcriptome analysis**

Transcriptome analysis was carried out for triplicate samples of differentiated SFO-NSCs with/without OS at D12 using Affymetrix GeneChip® Rat Genome 230 2.0 Array (Lot no: 4292682/ 4306659, Thermo Fisher). The reagents used were Affymetrix 3' IVT PLUS Kit (Lot no: 4289833, Thermo Fisher), GeneChip Hybridization, Wash and Stain Kit (Lot no: 4262632, Thermo Fisher). The microarray data in this manuscriptwere deposited in NCBI’s Gene Expression Omnibus and are accessible through GEO Series accession number GSE106515**.**

*Target Preparation:* The RNA samples were subjected to spectrophotometric measurements (BioSPEC-Mini, Shimadzu, Kyoto, Japan) and the quality of the RNA (RIN) was tested with Agilent Bioanalyzer (Agilent Technologies, Santa Clara, CA). Hybridization efficiency was evaluated from the scanned images. CEL files generated from AGCC (GeneChip Command Console Software) were imported into Expression Console (EC) 1.4 software for data quality control (QC) assessment. QC metrics were produced from samples through the normalization of RMA and MAS5. In total RNAs each 100 ng was used as a sample for the 3' IVT PLUS test. The results of purified cRNA are shown in supplementary data 8. Gel electrophoresis and electropherogram (supplementary data 9 and 10) were used to check the fragmented purified cRNAs size distributions. All the samples showed acceptable purity and concentrations. Metrics generated from AGCCC and Expression Console (EC) 1.4 were used for the Array QCs. Array QC metrics data, such as the 3' to 5' ratio of housekeeping genes, the presence of spike controls, the background value, the raw Q noise, the scaling factor, and the percent genes presence, were extracted out from Expression Console report. For example, the 3' to 5' ratio of housekeeping genes, which evaluates the efficiency of the cDNA synthesis reaction and ideally to be 1 and no more than 3.0, ranged between 0.8 and 0.9 for GADPH in the present study(supplementary data 8). The background value was used to quantify the signal intensity caused by autofluorescence of the array surface and non-specific binding of target or SAPE stain. The background values for all the arrays should be close to each other for accurate comparison. In this study, the background values consistently ranged between 34.4 and 37. 5 (supplementary data 8). The raw Q noise value, which arises from small variations in the digitized signal detected by the scanner while sampling the probe array’s surface, was measured by examining pixel to pixel variations in the background intensities. It ranged between 1.20 and 1.33 and consistent among samples(supplementary data 8), suggesting it to be consistent. The scaling factor, which measures the brightness of the array and should be within three-fold variation among arrays for accurate comparison, were within the acceptable range (supplementary data 8).Poly A spike quality controls, the set of polyadenylated RNA spikes (Lys, Phe, Thr, and Dap, prepared in staggered concentrations) that are processed along with the samples throughout the procedure (from cDNA synthesis), is useful in identifying problems with the target preparation. All the samples were shown to have consistent and expected staggered concentrations of the poly A controls, i.e. Lys < Phe < Thr < Dap (supplementary data 11). Bacteria spike controls are quality testing probe sets, hybridized with pre-labeled bacterial spike controls (BioB, BioC, BioD, and Cre prepared in staggered concentrations) and applied for the detection of potential hybridization, washing or staining problems. BioC, BioD and Cre should be present universally with increasing signal values while BioB may, at the very minimum, be present only 50% of the time as its concentration is at the limit of detection. In this study, all samples showed correct signal intensities of the bacterial spike controls including BioB, an indication of good hybridization (supplementary data 12).

**References**

Teh, D. B., Ishizuka, T., & Yawo, H. (2014). Regulation of later neurogenic stages of adult-derived neural stem/progenitor cells by L-type Ca2+ channels. Dev Growth Differ, 56(8), 583-594.

Palmer, T. D., Takahashi, J. & Gage, F. H. (1997). The adult rat hippocampus contains primordial neural stem cells. *Mol Cell Neurosci* 8(6), 389-404.

Niwa, H., Yamamura, K. & Miyazaki, J. (1991). Efficient selection for high-expression transfectants with a novel eukaryotic vector. *Gene* 108(2):193-199.

Li, X., Lobo, N., Bauser, C. & Fraser, M. (2001). The minimum internal and external sequence requirements for transposition of the eukaryotic transformation vector *piggyBac*. *Molecular Genetics and Genomics* 266(2),190-198.

Hososhima, S., Sakai, S., Ishizuka, T., & Yawo, H. (2015). Kinetic evaluation of photosensitivity in bi-stable variants of chimeric channelrhodopsins. *PLoS One, 10*(3), e0119558.


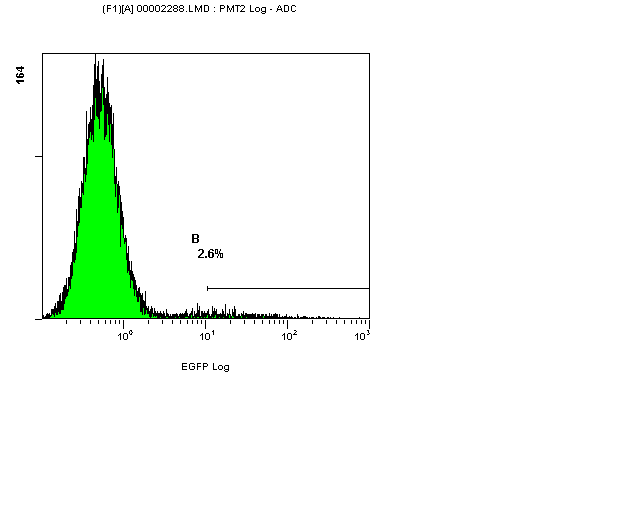

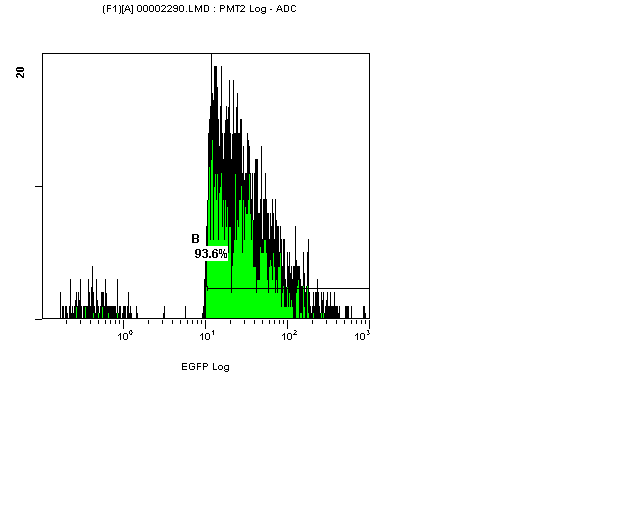


***a***

***b***

**Supplementary data 1**. **Purification of SFO-NSCs through fluorescent cell sorting.** **(a)** *piggyBac*-SFO (Venus conjugated) transfected into NSCs yield only about 2.6% of cells positive for EGFP (Venus) signal. **(b)** After cell sorting, 93.6% of the cells were Venus positive.

**
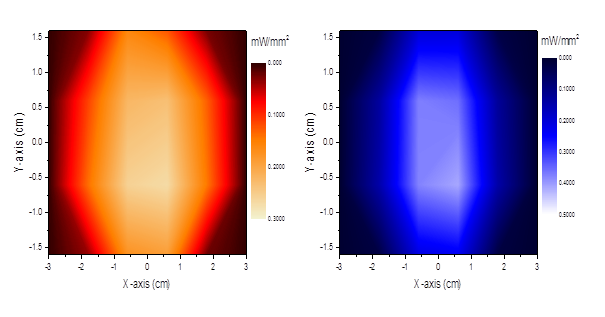
**

Blue

Amber

**Supplementary data 2**. **Uniform irradiance by the bi-color illumination device.** The amber and blue intensity was sufficient to turn off or depolarizes the SFO-NSCs.

| **Transcript Cluster ID** | **Fold change from control** | **ANOVA**  ***p*-value** | **Gene Symbol** | **Description** |
| --- | --- | --- | --- | --- |
| 1388460_at | 5.95 | 0.02072 | *Capg* | capping protein (actin filament), gelsolin-like |
| 1387599_a_at | 4.68 | 0.00479 | *Nqo1* | NAD(P)H dehydrogenase, quinone 1 |
| 1368130_at | 3.52 | 0.02037 | *Aldh3a1* | aldehyde dehydrogenase 3 family, member A1 |
| 1370269_at | 3.51 | 0.00550 | *Cyp1a1* | cytochrome P450, family 1, subfamily a, polypeptide 1 |
| 1370080_at | 3.48 | 0.00100 | *Hmox1* | heme oxygenase 1 |
| 1378738_at | 2.87 | 0.04564 | *Kcnab1* | potassium channel, voltage-gated shaker related subfamily A regulatory beta subunit 1 |
| 1375877_at | 2.83 | 0.01444 | *Syt4* | synaptotagmin IV |
| 1375961_at | 2.71 | 0.00000 | *Frzb* | frizzled-related protein |
| 1398659_at | 2.71 | 0.00393 | *Vwc2* | von Willebrand factor C domain containing 2 |
| 1367846_at | 2.67 | 0.04465 | *S100a4* | S100 calcium-binding protein A4 |
| 1376668_at | 2.46 | 0.00038 | *LOC100910316; Ttc39a* | tetratricopeptide repeat protein 39A-like; tetratricopeptide repeat domain 39A |
| 1387662_at | 2.42 | 0.00335 | *Syt4* | synaptotagmin IV |
| 1368990_at | 2.35 | 0.00540 | *Cyp1b1* | cytochrome P450, family 1, subfamily b, polypeptide 1 |
| 1387028_a_at | 2.31 | 0.01377 | *Id1* | inhibitor of DNA binding 1 |
| 1367584_at | 2.28 | 0.00173 | *Anxa2* | annexin A2 |
| 1376734_at | 2.28 | 0.00447 | *Nov* | nephroblastoma overexpressed |
| 1367648_at | 2.25 | 0.00076 | *Igfbp2* | insulin-like growth factor binding protein 2 |
| 1373615_at | 2.20 | 0.00031 | *Frzb* | frizzled-related protein |
| 1379452_at | 2.05 | 0.00205 | *Gas2* | growth arrest-specific 2 |
| 1380338_at | 2.04 | 0.00399 | *Sh2d5* | SH2 domain containing 5 |
| 1370138_at | 2.03 | 0.00025 | *Lef1* | lymphoid enhancer binding factor 1 |
| 1370016_at | 2.02 | 0.02443 | *Nell2* | neural EGFL like 2 |
| 1385325_at | 2.00 | 0.00714 | *Sntg2* | syntrophin, gamma 2 |
| 1367628_at | 1.97 | 0.00011 | *Lgals1* | lectin, galactoside-binding, soluble, 1 |
| 1367914_at | 1.97 | 0.00201 | *Emp3* | epithelial membrane protein 3 |
| 1377092_at | 1.95 | 0.02132 | *Socs3* | suppressor of cytokine signaling 3 |
| 1368511_at | 1.92 | 0.00321 | *Bhlhe41* | basic helix-loop-helix family, member e41 |
| 1371527_at | 1.91 | 0.00164 | *Emp1* | epithelial membrane protein 1 |
| 1397855_at | 1.91 | 0.01176 | *Gadl1; LOC103693176* | glutamate decarboxylase-like 1; uncharacterized LOC103693176 |
| 1390839_at | 1.90 | 0.01001 | *Pqlc3* | PQ loop repeat containing 3 |
| 1371731_at | 1.89 | 0.00074 | *Mest* | mesoderm specific transcript |
| 1386637_at | 1.87 | 0.03270 | *Fgl2* | fibrinogen-like 2 |
| 1390596_at | 1.86 | 0.03311 | *Mlana* | melan-A |
| 1398347_at | 1.86 | 0.00005 | *Axl* | Axl receptor tyrosine kinase |
| 1376513_a_at | 1.84 | 0.00043 | *LOC100910286* | uncharacterized LOC100910286 |
| 1390107_at | 1.84 | 0.00800 | *Sytl2* | synaptotagmin-like 2 |
| 1384238_at | 1.84 | 0.02666 | *Ttyh2* | tweety family member 2 |
| 1372468_at | 1.83 | 0.01479 | *Adgre5* | adhesion G protein-coupled receptor E5 |
| 1372510_at | 1.82 | 0.03533 | *Srxn1* | sulfiredoxin 1 |
| 1368883_at | 1.81 | 0.01578 | *Nov* | nephroblastoma overexpressed |
| 1367574_at | 1.79 | 0.04160 | *Vim* | vimentin |
| 1369931_at | 1.79 | 0.04386 | *LOC100362738; LOC100364062; Pkm* | M2 pyruvate kinase-like; pyruvate kinase, muscle |
| 1370224_at | 1.77 | 0.00006 | *Stat3* | signal transducer and activator of transcription 3 (acute-phase response factor) |
| 1387995_a_at | 1.77 | 0.03691 | *Ifitm3* | interferon induced transmembrane protein 3 |
| 1376733_at | 1.76 | 0.02252 | *Igsf11* | immunoglobulin superfamily, member 11 |
| 1370503_s_at | 1.75 | 0.01861 | *Epb41l3* | erythrocyte membrane protein band 4.1-like 3 |
| 1372752_at | 1.75 | 0.00525 | *LOC100911766; Tspan4* | tetraspanin-4-like; tetraspanin 4 |
| 1371781_at | 1.73 | 0.00032 | *Stat3* | signal transducer and activator of transcription 3 (acute-phase response factor) |
| 1376637_at | 1.73 | 0.00233 | *Edil3* | EGF-like repeats and discoidin I-like domains 3 |
| 1390317_at | 1.73 | 0.01797 | *RGD1561849* | similar to RIKEN cDNA 3110035E14 |

**Supplementary data 3**. **50 most significantly upregulated genes by OS.** Ordered by fold change compared to the control (*p<0.05,* ONE-WAY unpaired ANOVA).

| **Transcript Cluster ID** | **Fold change from control** | **ANOVA**  **p-value** | **Gene Symbol** | **Description** |
| --- | --- | --- | --- | --- |
| 1370517_at | -3.92 | 0.00025 | *Nptx1* | neuronal pentraxin I |
| 1376619_at | -2.13 | 0.01968 | *Ptprd* | protein tyrosine phosphatase, receptor type, D |
| 1393954_at | -2.12 | 0.04482 | *Chrdl2* | chordin-like 2 |
| 1385393_at | -2.09 | 0.01137 | *Ppargc1a* | peroxisome proliferator-activated receptor gamma, coactivator 1 alpha |
| 1393743_at | -2.04 | 0.03126 | *Ppargc1a* | peroxisome proliferator-activated receptor gamma, coactivator 1 alpha |
| 1383418_at | -2.00 | 0.04949 | *Adam11* | ADAM metallopeptidase domain 11 |
| 1393672_at | -1.99 | 0.01457 | *Hmcn1* | hemicentin 1 |
| 1374643_at | -1.96 | 0.02660 | *Fat4* | FAT atypical cadherin 4 |
| 1385497_x_at | -1.96 | 0.03625 | *Lnx1* | ligand of numb-protein X 1, E3 ubiquitin protein ligase |
| 1370905_at | -1.91 | 0.02628 | *Dock9* | dedicator of cytokinesis 9 |
| 1372995_at | -1.90 | 0.04300 | *Prkd2* | protein kinase D2 |
| 1378601_at | -1.90 | 0.02649 | *Mboat2* | membrane bound O-acyltransferase domain containing 2 |
| 1391673_at | -1.88 | 0.04313 | *Arhgap20* | Rho GTPase activating protein 20 |
| 1370994_at | -1.87 | 0.01618 | *Hip1r* | huntingtin interacting protein 1 related |
| 1372583_at | -1.87 | 0.01058 | *Tmtc1* | transmembrane and tetratricopeptide repeat containing 1 |
| 1377974_at | -1.80 | 0.02560 | *Itgb8* | integrin, beta 8 |
| 1381574_at | -1.80 | 0.00226 | *Agmo* | alkylglycerol monooxygenase |
| 1368822_at | -1.79 | 0.02841 | *Fstl1* | follistatin-like 1 |
| 1393000_at | -1.79 | 0.01695 | *LOC100910792* | amphiphysin-like |
| 1374591_at | -1.78 | 0.00460 | *Ptprd* | protein tyrosine phosphatase, receptor type, D |
| 1373859_at | -1.75 | 0.04367 | *Yipf6* | Yip1 domain family, member 6 |
| 1370831_at | -1.71 | 0.04489 | *Mgll* | monoglyceride lipase |
| 1387548_at | -1.70 | 0.00689 | *Has2* | hyaluronan synthase 2 |
| 1392223_at | -1.68 | 0.03174 | *Epn2* | epsin 2 |
| 1393307_at | -1.66 | 0.00781 | *Phactr3* | phosphatase and actin regulator 3 |
| 1392444_at | -1.65 | 0.04852 | *Chst5* | carbohydrate (N-acetylglucosamine 6-O) sulfotransferase 5 |
| 1374943_at | -1.63 | 0.03424 | *Fam210b* | family with sequence similarity 210, member B |
| 1398447_at | -1.63 | 0.04156 | *Igip* | IgA-inducing protein |
| 1370248_at | -1.59 | 0.03514 | *Fxyd6* | FXYD domain-containing ion transport regulator 6 |
| 1370310_at | -1.59 | 0.00407 | *Hmgcs2* | 3-hydroxy-3-methylglutaryl-CoA synthase 2 (mitochondrial) |
| 1383649_a_at | -1.57 | 0.03400 | *Ddx26b* | DEAD/H (Asp-Glu-Ala-Asp/His) box polypeptide 26B |
| 1380766_a_at | -1.57 | 0.02408 | *Nol4l* | nucleolar protein 4-like |
| 1373843_at | -1.55 | 0.01243 | *Akap2* | A kinase (PRKA) anchor protein 2 |
| 1386934_at | -1.55 | 0.01859 | *Slc6a8* | solute carrier family 6 (neurotransmitter transporter), member 8 |
| 1393281_at | -1.55 | 0.00608 | *Cav1* | caveolin 1, caveolae protein |
| 1380180_at | -1.54 | 0.00627 | *Tnik* | TRAF2 and NCK interacting kinase |
| 1389698_at | -1.53 | 0.03263 | *Unc13b* | unc-13 homolog B (C. elegans) |
| 1398596_at | -1.53 | 0.03424 | *Nktr* | natural killer cell triggering receptor |
| 1379894_at | -1.53 | 0.03247 | *RGD1310110* | similar to 3632451O06Rik protein |
| 1368105_at | -1.52 | 0.02110 | *Tspan2* | tetraspanin 2 |
| 1370432_at | -1.52 | 0.01477 | *Pou3f1* | POU class 3 homeobox 1 |
| 1383932_at | -1.52 | 0.02311 | *Phf20l1* | PHD finger protein 20-like 1 |
| 1392541_at | -1.52 | 0.01083 | *Ggct* | gamma-glutamyl cyclotransferase |
| 1394456_at | -1.52 | 0.03935 | *Thrb* | thyroid hormone receptor beta |
| 1370089_at | -1.51 | 0.03239 | *Ppargc1a* | peroxisome proliferator-activated receptor gamma, coactivator 1 alpha |
| 1377064_at | -1.50 | 0.04903 | *Dusp6* | dual specificity phosphatase 6 |
| 1378406_at | -1.50 | 0.04452 | *Ttc14* | tetratricopeptide repeat domain 14 |
| 1391711_at | -1.50 | 0.02217 | *Vangl1* | VANGL planar cell polarity protein 1 |
| 1393653_at | -1.50 | 0.02245 | *Pid1* | phosphotyrosine interaction domain containing 1 |
| 1380317_at | -1.49 | 0.03922 | *Cdh10* | cadherin 10 |

**Supplementary data 4**. **50 most significantly downregulated genes by OS.** Ordered by fold change compared to the control (*p<0.05,* ONE-WAY unpaired ANOVA).

| **Term** | **Count** | ***p*-Value** | **Gene Symbol** | **Fold Enrichment** |
| --- | --- | --- | --- | --- |
| Extrinsic component of plasma membrane | 3 | 7.80E-03 | *S100a10, Anxa2, Sytl2* | 22.27747 |
| Melanosome | 5 | 7.82E-04 | *Anxa2, Sytl2, Capg, Mlana, Gpnmb* | 11.96382 |
| Basement membrane | 4 | 9.00E-03 | *Anxa2, Runx1, Vwc2, Col2a1* | 9.262316 |
| Vesicle | 6 | 8.74E-04 | *Anxa2, Spp1, Bmp2, Gapdh, Syt4, Syt4, Anxa1* | 8.025423 |
| Extracellular matrix | 9 | 2.17E-05 | *Tubb5, Nov, Lgals1 ,Edil3, Fgfr2, Vim, Col11a1, Emilin1, Col2a1* | 7.630471 |
| Proteinaceous extracellular matrix | 6 | 6.18E-03 | *Nov, Lgals1, Col11a1, Emilin1, Vwc2, Col2a1* | 5.107087 |
| Axon | 8 | 1.35E-03 | *Gap43, Syt1, Kcnab1, Tnfrsf21, Avil, Nov, Tnfrsf21, Vim, Syt4, Syt4* | 4.772273 |
| Intracellular membrane-bounded organelle | 10 | 4.25E-03 | *Cyp1a1, Nov, Gapdh, Fgfr2, Aldh3a1, Cyp1b1, Myof, Syt4, Syt4, Ipo5, Runx1* | 3.13007 |
| Extracellular space | 16 | 8.81E-04 | *Frzb, Il33, S100a4, Col2a1, Anxa2, Spp1, Axl, Bmp2, S100a11, Lgals1, Aldh3a1, Sema3g, Igfbp2, Nell2, Anxa1, Vwc2, Frzb* | 2.618223 |
| Extracellular exosome | 28 | 3.16E-05 | *Tpm3, Edil3, Myof, C1r, S100a4, Emilin1, Fgl2, Adgre5, Anxa2, Spp1, Tubb5, Capg, S100a11, Lgals1, Ifitm3, Igfbp2, Sema3g, Wwp2, Fgl2, Mest, Gapdh, Vim, Nqo1, Qprt, S100a10, Axl, Fgl2, Igsf11, Fgl2, Anxa1, B4galt5* | 2.278824 |
| Cytoplasm | 42 | 6.99E-05 | *Tpm3, Avil, Fgfr2, Lef1, Ipo5, Gadd45g, Col2a1, Erbb2ip, Emp2, Anxa2, Gap43, Car8, Spp1, Cyp1a1, Capg, S100a11, Lgals1, Id1, Ifitm3, Runx1, Stat3, Wwp2, Id2, Stat3, Sytl2, Nov, Gapdh, Srxn1, Vim, Irak1, Nqo1, Pls3, Epb41l3, Qprt, Id4, Syt1, Bmp2, Aldh3a1, Nell2, Anxa1, Pir, Mylk3, Pabpc4;_RGD1562451, Lef1* | 1.730371 |

**Supplementary data 5**. **Enriched Cellular Components.** Enriched components were ranked according to their fold enrichment. The most upregulated gene, *Capg* was found in the “*Melanosome*”, “*Extracellular exosome*” and “*Cytoplasm*”.

| **Term** | **Count** | ***p*-Value** | **Gene Symbol** | **Fold Enrichment** |
| --- | --- | --- | --- | --- |
| Proteoglycan metabolic process | 3 | 3.36E-04 | *Bmp2, Col11a1, Col2a1* | 103.15 |
| Membrane raft assembly | 3 | 3.36E-04 | *S100a10, Emp2, Anxa2* | 103.15 |
| Positive regulation of vesicle fusion | 3 | 7.99E-04 | *Anxa2, Syt1, Anxa1* | 68.76 |
| Bleb assembly | 3 | 1.21E-03 | *Emp2, Emp3, Emp1* | 56.26 |
| Negative regulation of DNA binding | 4 | 4.76E-04 | *Hmox1, Id1, Lef1, Id2, Lef1* | 25.79 |
| Cell death | 4 | 8.56E-04 | *Emp2, Emp3, Hmox1, Emp1* | 21.16 |
| Collagen fibril organization | 4 | 9.22E-04 | *Anxa2, Cyp1b1, Col11a1, Col2a1* | 20.63 |
| Positive regulation of cell-substrate adhesion | 4 | 1.30E-03 | *Spp1, Edil3, Emilin1, Vwc2* | 18.34 |
| Chondrocyte differentiation | 4 | 1.39E-03 | *Bmp2, Nov, Runx1, Col2a1* | 17.94 |
| Cell development | 4 | 2.84E-03 | *Lef1, Id2, Arid5b, Lef1* | 13.99 |
| Bone development | 4 | 3.42E-03 | *Fgfr2, Papss2, Papss2, Pls3, Col2a1* | 13.10 |
| Positive regulation of smooth muscle cell proliferation | 5 | 6.75E-04 | *Hmox1, Abcc4, Fgfr2, Irak1, Id2* | 12.43 |
| Negative regulation of sequence-specific DNA binding transcription factor activity | 4 | 4.61E-03 | *Hmox1, Id1, Id2, Wwp2* | 11.79 |
| Inner ear morphogenesis | 4 | 4.79E-03 | *Frzb, Fgfr2, Col11a1, Frzb, Col2a1* | 11.62 |
| Response to retinoic acid | 4 | 5.80E-03 | *Bmp2, Igfbp2, Runx1, Mest* | 10.86 |
| Ossification | 5 | 1.26E-03 | *Spp1, Bmp2, Col11a1, Runx1, Col2a1* | 10.53 |
| Circadian rhythm | 5 | 2.72E-03 | *Timeless, Id1, Bhlhe41, Id2, Id4* | 8.52 |
| Cellular response to organic cyclic compound | 5 | 2.80E-03 | *Stat3, Cyp1a1, Bmp2, Lgals1, Cyp1b1, Stat3* | 8.45 |
| Response to organic cyclic compound | 10 | 6.07E-06 | *Stat3, Cyp1a1, Id1, Abcc4, Lef1, Aldh3a1, Cyp1b1, Nqo1, Anxa1, Stat3, Lef1* | 7.58 |
| Response to organic substance | 5 | 6.12E-03 | *Stat3, Spp1, Cyp1a1, Abcc4, Cyp1b1, Stat3* | 6.79 |
| Cell adhesion | 8 | 2.55E-04 | *Emp2, Igsf11, Spp1, Nov, Lef1, Cyp1b1, Gpnmb, Emilin1, Lef1* | 6.32 |
| Response to estradiol | 6 | 2.79E-03 | *Stat3, Cyp1b1, Vim, Igfbp2, Nqo1, Anxa1, Stat3* | 6.16 |
| Positive regulation of gene expression | 10 | 7.01E-05 | *Stat3, Bmp2, Il33, Id1, Fgfr2, Lef1, Vim, Stat3, Id2, Lef1, Id4* | 5.56 |
| Negative regulation of cell proliferation | 9 | 4.22E-04 | *Stat3, Hmox1, Bmp2, Frzb, Ifitm3, Fgfr2, Cyp1b1, Tgif1, Runx1, Stat3, Frzb* | 4.96 |
| Aging | 7 | 4.03E-03 | *Stat3, Cyp1a1, Aldh3a1, Vim, Irak1, Igfbp2, Nqo1, Stat3* | 4.58 |
| Negative regulation of transcription, DNA-templated | 10 | 9.94E-04 | *Timeless, Bmp2, Id1, Bhlhe41, Lef1, Irak1, Runx1, Id2, Wwp2, Lef1, Id4* | 3.88 |
| Response to drug | 9 | 3.76E-03 | *S100a10, Stat3, Cyp1a1, Lgals1, Abcc4, Aldh3a1, Igfbp2, Anxa1, Tgif1, Stat3* | 3.52 |
| Oxidation-reduction process | 10 | 3.91E-03 | *Me1, Me1, Kcnab1, Cyp1a1, Bmp2, Gapdh, Aldh3a1, Srxn1, Cyp1b1, Nqo1, Pir* | 3.17 |
| Negative regulation of transcription from RNA polymerase II promoter | 11 | 2.94E-03 | *Timeless, Bmp2, Id1, Bhlhe41, Fgfr2, Lef1, Tgif1, Id2, Wwp2, Arid5b, Lef1, Id4* | 3.04 |
| Response to starvation | 3 | 3.69E-03 | *Ppargc1a, Hmgcs2, Fstl1* | -32.02 |

**Supplementary data 6**. **Enriched Biological Processes.** Enriched components were ranked according to their fold enrichment. Red font indicates a negatively enriched process.

| **Term** | **Count** | ***p*-Value** | **Gene Symbol** | **Fold Enrichment** |
| --- | --- | --- | --- | --- |
| Phosphatidylserine binding | 5 | 3.57E-05 | *Gap43, Syt1, Sytl2, Axl, Syt4, Syt4* | 26.37 |
| Calcium-dependent phospholipid binding | 5 | 9.19E-05 | *Anxa2, Syt1, Sytl2, Syt4, Syt4, Anxa1* | 20.79 |
| Calcium-dependent protein binding | 5 | 3.26E-04 | *Anxa2, Syt1, S100a11, Anxa1, S100a4* | 15.02 |
| Integrin binding | 5 | 1.13E-03 | *Emp2, Nov, Edil3, Gpnmb, Erbb2ip* | 10.81 |
| Phospholipid binding | 4 | 6.04E-03 | *Syt1, Myof, Syt4, Syt4, Anxa1* | 10.68 |
| Calcium ion binding | 14 | 1.43E-05 | *Sytl2, Edil3, C1r, Syt4, S100a4, Pls3, Syt4, Anxa2, Adgre5, S100a10, Syt1, S100a11, Nell2, Anxa1, Runx1* | 4.35 |
| Protein homodimerization activity | 16 | 2.91E-06 | *Fgfr2, Irak, Syt4, Syt4, S100a4, Qprt, S100a10, Syt1, Hmox1, S100a11, Timeless, Bmp2, Id1, Lgals1, Bhlhe41, Anxa1, Runx1* | 4.30 |
| Protein heterodimerization activity | 10 | 9.42E-04 | *Syt1, Axl, Timeless, Bmp2, Bhlhe41, Syt4, Irak1, Syt4, S100a4, Runx1, Id2* | 3.89 |
| Identical protein binding | 9 | 9.19E-03 | *Stat3, Syt1, Gapdh, Vim, Nell2, Nqo1, S100a4, Emilin1, Stat3, Col2a1* | 3.01 |

**Supplementary data 7**. **Enriched Molecular Function.** Enriched components were ranked according to their fold enrichment.

**a**


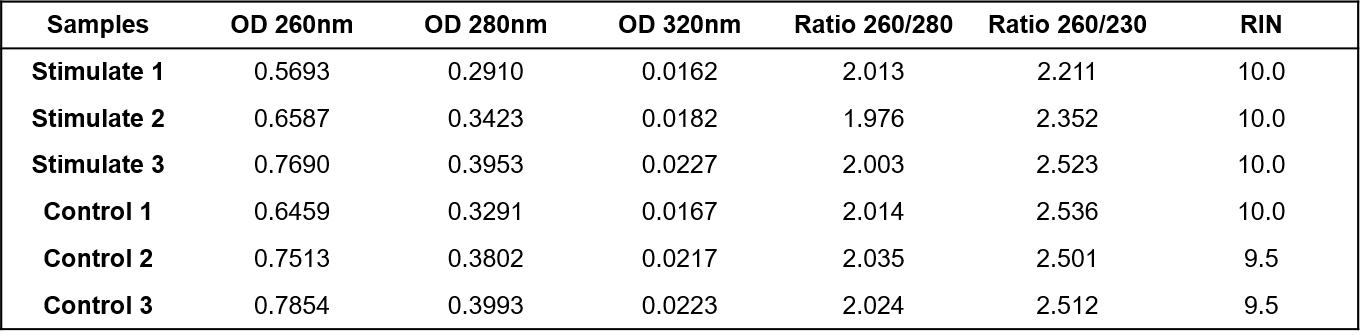


**b**


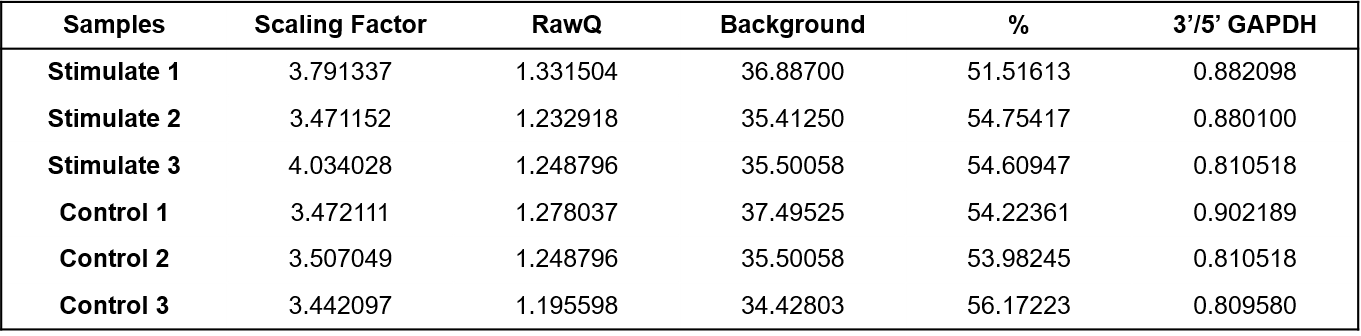


**Supplementary data 8**. **Quality Control checks of all RNA samples. (a)** The ratios of 260/280 and 260/230 were assessed to be within the acceptable range. **(b)** RNA samples were also assessed for RIN to evaluate the integrity.

**Stimulate 3**

**Control 3**

**Control 2**

**Stimulate 1**

**Stimulate 2**

**Control 1**

**Supplementary data 9**. **Quality control checks for RNA samples.** Gel like images from Agilent Bioanalyzer for all RNA samples.

**Ladder**


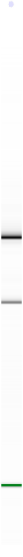


**Stimulate 1**

**Stimulate 2**

**Stimulate 3**

**Control 1**

**Control 2**

**Control 3**

**Supplementary data 10**. **Electropherogram of each sample.** All samples have two peaks at 18 s and 28 s. The *x-*axis represents time in seconds (s), while the *y*-axis represents arbitrary fluorescence unit. All samples showed high intact RNA.

**Supplementary data 11**. **Average intensities of Poly A controls.** Poly A controls are important to pinpoint problems with target preparations. All samples were shown to have consistent staggering concentrations of the poly A controls (Lys<Phe<Thr<Dap).


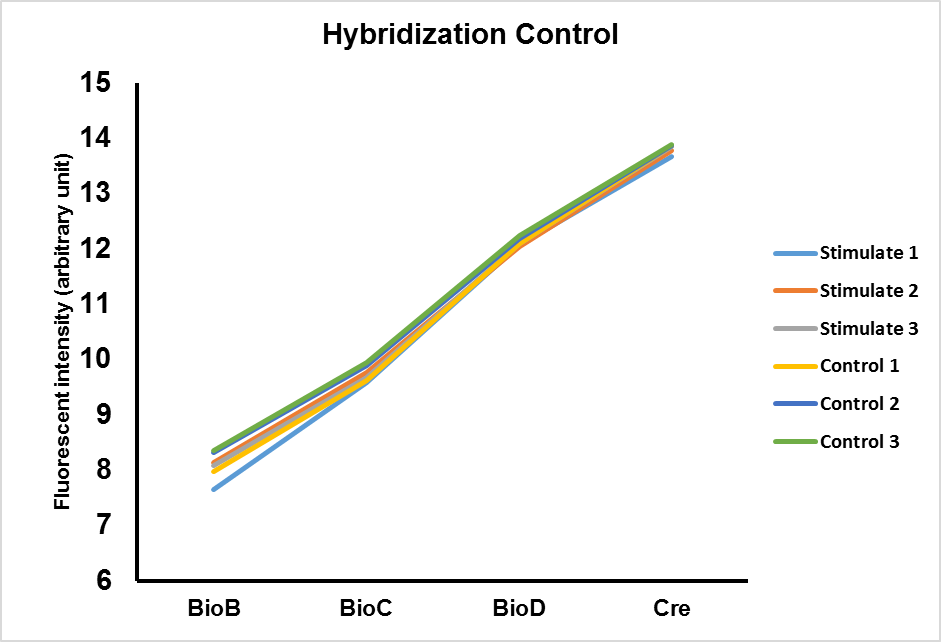


**Supplementary data 12**. **Average intensities of Bacteria Hybridization Control.** The absence of or low BioC, BioD, and Cre signal often indicates potential problems with the hybridization and subsequent washing and staining steps. BioB usually presents only 50% of the time, as its concentration is at the limit of detection. BioC, BioD, and Cre, including BioB showed high signal intensity throughout the experiments, indicating good hybridization was made.
